# Supplementary material for: Direct visualization of single-molecule membrane protein interactions in living cells
Source: PLoS Biol. 2018 Dec 13;16(12):e2006660. doi: 10.1371/journal.pbio.2006660 (PMC6307816; doi:10.1371/journal.pbio.2006660)
Supplement: S1 Data — (XLSX) [file pbio.2006660.s001.xlsx]

## Sheet: Fig. 1C
	PMT				EGFR				ErbB2				ErbB3				InsR				b2-AR
	NT	Anti-EGFR antibody			NT	Anti-EGFR antibody			NT	Anti-EGFR antibody			NT	Anti-EGFR antibody			NT	Anti-EGFR antibody			NT	Anti-EGFR antibody
Cell-01	12.7113	14.9193		Cell-01	10.2707	95.4968		Cell-01	26.2298	32.4989		Cell-01	11.0885	8.5748		Cell-01	20.2765	16.7538		Cell-01	9.39	9.5
Cell-02	10.3115	9.3827		Cell-02	7.4607	91.3339		Cell-02	16.3602	16.6625		Cell-02	12.9594	17.832		Cell-02	22.213	22.2738		Cell-02	8.2768	8.9327
Cell-03	6.2987	8.0007		Cell-03	12.4959	96.3972		Cell-03	23.5137	39.4375		Cell-03	15.7507	11.8099		Cell-03	24.8214	21.7612		Cell-03	11.979	7.741
Cell-04	14.5894	15.3027		Cell-04	6.2786	96.0186		Cell-04	10.3101	17.2176		Cell-04	11.3307	10.6862		Cell-04	18.0412	15.9371		Cell-04	7.4094	12.3602
Cell-05	4.8649	5.6841		Cell-05	5.5699	93.5658		Cell-05	12.0991	23.5211		Cell-05	8.4276	8.9975		Cell-05	16.8335	21.0798		Cell-05	9.0494	7.206
Cell-06	3.6443	6.2116		Cell-06	11.6271	97.7866		Cell-06	21.0601	18.11		Cell-06	15.1812	17.3439		Cell-06	19.9715	28.7572		Cell-06	3.6	10.1696
Cell-07	6.343	5.9139		Cell-07	7.8442	94.1497		Cell-07	23.7972	29.2207		Cell-07	13.1984	13.1655		Cell-07	6.4836	9.6036		Cell-07	10.6547	9.458
Cell-08	6.1826	7.914		Cell-08	4.8248	97.1673		Cell-08	21.8153	36.6345		Cell-08	17.2009	14.9013		Cell-08	12.7869	16.737		Cell-08	4.9575	4.7185
Cell-09	6.6742	6.8871		Cell-09	8.1494	97.9471		Cell-09	14.2719	12.6213		Cell-09	18.1326	12.0695		Cell-09	16.468	22.6313		Cell-09	7.0313	4.9323
Cell-10	6.2626	6.2209		Cell-10	6.4357	97.3914		Cell-10	25.2718	35.5917		Cell-10	17.8744	13.3305		Cell-10	10.61	13.1163		Cell-10	7.4856	5.4182
Cell-11	10.1272	9.5861		Cell-11	13.7065	95.5481		Cell-11	18.0172	33.4411		Cell-11	18.9437	18.2494		Cell-11	8.6425	17.2888		Cell-11	10.1155	7.9288
Cell-12	4.126	5.8787		Cell-12	6.0851	93.9426		Cell-12	25.8004	38.5042		Cell-12	16.8561	13.4373		Cell-12	13.4512	18.899		Cell-12	11.006	8.895
Cell-13	5.9882	3.308		Cell-13	8.9272	97.3218		Cell-13	21.2286	24.8115		Cell-13	16.395	13.8714		Cell-13	17.4487	26.2529		Cell-13	9.0654	11.0394
Cell-14	9.6055	6.8539		Cell-14	12.5396	90.6844		Cell-14	19.3192	31.0075		Cell-14	10.5173	8.5101		Cell-14	13.9278	24.4361		Cell-14	3.8228	5.3724
Cell-15	14.5774	7.9802		Cell-15	9.1979	88.7551		Cell-15	16.1493	23.1392		Cell-15	9.4518	13.3855		Cell-15	8.3969	11.4479		Cell-15	9.9985	6.0876
Cell-16	9.2071	10.7376		Cell-16	8.9726	92.5259		Cell-16	20.9917	33.5322		Cell-16	14.2527	11.7772		Cell-16	13.892	16.2015		Cell-16	7.0979	6.9164

## Sheet: Fig. 2C
	SNAP-EGFR					EGFR-mEos3.2
	NT		Anti-SNAP antibody			NT		Anti-SNAP antibody
	Diffusion coefficient (mm2/s)	Probability density	Diffusion coefficient (mm2/s)	Probability density		Diffusion coefficient (mm2/s)	Probability density	Diffusion coefficient (mm2/s)	Probability density
	1.1118e-05	0	1.1118e-05	0		3.7308e-06	0.00062364	3.7308e-06	0.00061429
	1.4607e-05	0	1.4607e-05	0		4.9018e-06	0	4.9018e-06	0
	1.9192e-05	0	1.9192e-05	0		6.4403e-06	0.00031182	6.4403e-06	0
	2.5216e-05	0	2.5216e-05	0		8.4618e-06	0.00062364	8.4618e-06	0.00092144
	3.313e-05	0	3.313e-05	0		1.1118e-05	0	1.1118e-05	0.00030715
	4.3529e-05	0	4.3529e-05	0		1.4607e-05	0.00062364	1.4607e-05	0
	5.7192e-05	0	5.7192e-05	0		1.9192e-05	0.0012473	1.9192e-05	0.00061429
	7.5143e-05	0	7.5143e-05	0		2.5216e-05	0.00062364	2.5216e-05	0.0012286
	9.8728e-05	0	9.8728e-05	0		3.313e-05	0.00031182	3.313e-05	0.0012286
	0.00012972	0	0.00012972	0		4.3529e-05	0.00093546	4.3529e-05	0.00215
	0.00017043	0.00036713	0.00017043	0.00034018		5.7192e-05	0.00093546	5.7192e-05	0.0030715
	0.00022392	0.00036713	0.00022392	0.0020411		7.5143e-05	0.00031182	7.5143e-05	0.0055286
	0.00029783	0.0027239	0.00029783	0.0050521		9.8728e-05	0.0018709	9.8728e-05	0.0052215
	0.00035794	0.0018159	0.00035794	0.0065678		0.00012972	0.00343	0.00012972	0.0049144
	0.00043018	0.0043582	0.00043018	0.0116		0.00017043	0.00343	0.00017043	0.0086001
	0.000517	0.0054477	0.000517	0.0182		0.00022392	0.0049891	0.00022392	0.012
	0.00062135	0.0076268	0.00062135	0.0308		0.00029421	0.0071718	0.00029421	0.0154
	0.00074675	0.0114	0.00074675	0.0541		0.00038655	0.0090428	0.00038655	0.0252
	0.00089747	0.0131	0.00089747	0.0859		0.00050788	0.0159	0.00050788	0.0353
	0.0010786	0.0185	0.0010786	0.143		0.00066729	0.0215	0.00066729	0.0473
	0.0012963	0.0245	0.0012963	0.2435		0.00087673	0.0331	0.00087673	0.0759
	0.0015579	0.0349	0.0015579	0.3536		0.0011519	0.048	0.0011519	0.11
	0.0018724	0.0452	0.0018724	0.5274		0.0015135	0.053	0.0015135	0.1247
	0.0022502	0.0577	0.0022502	0.7886		0.0019885	0.0636	0.0019885	0.1723
	0.0027044	0.0779	0.0027044	0.9402		0.0026126	0.0833	0.0026126	0.2156
	0.0032502	0.0937	0.0032502	1.0756		0.0034327	0.0914	0.0034327	0.2764
	0.0039062	0.1062	0.0039062	1.1665		0.0045101	0.0951	0.0045101	0.2909
	0.0046946	0.1144	0.0046946	1.1585		0.0059257	0.1129	0.0059257	0.2863
	0.0056421	0.1204	0.0056421	1.1089		0.0077856	0.1129	0.0077856	0.266
	0.0067808	0.122	0.0067808	0.9584		0.0102	0.1172	0.0102	0.246
	0.0081494	0.1193	0.0081494	0.825		0.0134	0.1406	0.0134	0.2254
	0.0097941	0.1237	0.0097941	0.7321		0.0177	0.1453	0.0177	0.2469
	0.0118	0.1324	0.0118	0.6052		0.0232	0.174	0.0232	0.2503
	0.0141	0.1433	0.0141	0.4648		0.0305	0.2033	0.0305	0.3139
	0.017	0.1531	0.017	0.3536		0.0401	0.2479	0.0401	0.3624
	0.0204	0.1547	0.0204	0.2683		0.0526	0.3134	0.0526	0.4291
	0.0246	0.1694	0.0246	0.2092		0.0691	0.4107	0.0691	0.5092
	0.0295	0.1885	0.0295	0.1364		0.0908	0.5332	0.0908	0.5977
	0.0355	0.2065	0.0355	0.1066		0.1194	0.6829	0.1194	0.6539
	0.0426	0.2304	0.0426	0.0657		0.1568	0.8288	0.1568	0.708
	0.0512	0.274	0.0512	0.0359		0.206	0.9311	0.206	0.6739
	0.0616	0.3348	0.0616	0.0217		0.2707	0.9376	0.2707	0.548
	0.074	0.465	0.074	0.0147		0.3557	0.831	0.3557	0.3603
	0.0889	0.5132	0.0889	0.0045469		0.4673	0.5681	0.4673	0.1751
	0.1069	0.6592	0.1069	0.0040417		0.614	0.3315	0.614	0.0903
	0.1285	0.8128	0.1285	0.0015156		0.8067	0.1668	0.8067	0.0347
	0.1544	0.9018	0.1544	0.0015156		1.0599	0.0714	1.0599	0.0147
	0.1855	1.0748	0.1855	0		1.3925	0.0234	1.3925	0.0058358
	0.223	1.1206	0.223	0		1.8296	0.0081073	1.8296	0.0015357
	0.268	1.1032	0.268	0		2.4039	0.0037418	2.4039	0.00092144
	0.3221	0.9457	0.3221	0
	0.3871	0.7839	0.3871	0
	0.4652	0.5459	0.4652	0
	0.5591	0.31	0.5591	0
	0.6719	0.1275	0.6719	0
	0.8076	0.0708	0.8076	0
	0.9705	0.0398	0.9705	0
	1.1664	0.0251	1.1664	0
	1.4018	0.0169	1.4018	0
	1.6848	0.0098059	1.6848	0
	2.0248	0.0054477	2.0248	0
	2.4335	0.0054477	2.4335	0

## Sheet: Fig. 2D
		NT	Anti-SNAP antibody
	SNAP-A647	12.87	95.16
	mEos3.2	13.9	36.61

## Sheet: Fig. 2E
	Elapsed time (s)	Fluorescence intensity (A.U.)
	0.0518	332.533
	0.1036	302.8
	0.1554	320.133
	0.2072	324.133
	0.259	338.4
	0.3108	324.533
	0.3626	322
	0.4144	333.6
	0.4662	339.867
	0.518	322
	0.5698	344.533
	0.6216	323.2
	0.6734	317.467
	0.7252	326.667
	0.777	309.467
	0.8288	291.733
	0.8806	301.733
	0.9324	332.4
	0.9842	314.667
	1.036	298.267
	1.0878	321.2
	1.1396	319.067
	1.1914	316.8
	1.2432	347.733
	1.295	317.6
	1.3468	308.933
	1.3986	316.133
	1.4504	312.4
	1.5022	342
	1.554	331.333
	1.6058	330.133
	1.6576	312.8
	1.7094	323.2
	1.7612	328.4
	1.813	331.867
	1.8648	309.067
	1.9166	335.6
	1.9684	338.133
	2.0202	312.4
	2.072	322.667
	2.1238	311.067
	2.1756	342
	2.2274	296
	2.2792	315.467
	2.331	324.933
	2.3828	315.067
	2.4346	322.267
	2.4864	315.2
	2.5382	298.8
	2.59	307.733
	2.6418	315.867
	2.6936	311.467
	2.7454	334.533
	2.7972	320.667
	2.849	305.067
	2.9008	299.333
	2.9526	329.733
	3.0044	298.4
	3.0562	313.6
	3.108	313.6
	3.1598	322
	3.2116	318
	3.2634	303.6
	3.3152	302.8
	3.367	312.133
	3.4188	317.467
	3.4706	314.267
	3.5224	328.533
	3.5742	346.4
	3.626	311.333
	3.6778	327.467
	3.7296	311.867
	3.7814	300.4
	3.8332	310.133
	3.885	286
	3.9368	297.333
	3.9886	314.4
	4.0404	301.333
	4.0922	301.6
	4.144	310.933
	4.1958	289.6
	4.2476	302.933
	4.2994	316.133
	4.3512	328.667
	4.403	290.933
	4.4548	311.733
	4.5066	318.533
	4.5584	304.533
	4.6102	314.933
	4.662	326.933
	4.7138	308.267
	4.7656	309.6
	4.8174	329.733
	4.8692	327.6
	4.921	314.533
	4.9728	319.333
	5.0246	316.4
	5.0764	320.4
	5.1282	328.533
	5.18	322
	5.2318	317.6
	5.2836	299.333
	5.3354	321.6
	5.3872	322.933
	5.439	344.533
	5.4908	300.4
	5.5426	299.467
	5.5944	336.8
	5.6462	335.333
	5.698	324.133
	5.7498	347.067
	5.8016	317.067
	5.8534	295.333
	5.9052	329.333
	5.957	306.533
	6.0088	352.533
	6.0606	294.4
	6.1124	338.133
	6.1642	317.067
	6.216	314.933
	6.2678	342.133
	6.3196	326
	6.3714	332.4
	6.4232	321.2
	6.475	337.6
	6.5268	342.8
	6.5786	322.8
	6.6304	322.133
	6.6822	314.667
	6.734	343.733
	6.7858	288.533
	6.8376	202.667
	6.8894	212
	6.9412	204
	6.993	208
	7.0448	205.111
	7.0966	201.889
	7.1484	205.111
	7.2002	203.889
	7.252	220.667
	7.3038	214.444
	7.3556	206.778
	7.4074	202.778
	7.4592	209.778
	7.511	208
	7.5628	206.444
	7.6146	214.667
	7.6664	214.111
	7.7182	206.556
	7.77	203.556
	7.8218	199.889
	7.8736	210.444
	7.9254	221
	7.9772	209.111
	8.029	203.667
	8.0808	201.556
	8.1326	203.667
	8.1844	211.222
	8.2362	211.111
	8.288	203.889
	8.3398	200.667
	8.3916	224.444
	8.4434	212.667
	8.4952	200.222
	8.547	210.556
	8.5988	218.778
	8.6506	213.222
	8.7024	219.778
	8.7542	198.444
	8.806	217.778
	8.8578	202.111
	8.9096	203.667
	8.9614	208.444
	9.0132	213.889
	9.065	205.222
	9.1168	209.222
	9.1686	202.667
	9.2204	209.333
	9.2722	208.667
	9.324	218.667
	9.3758	225.889
	9.4276	210.556
	9.4794	205.222
	9.5312	226.111
	9.583	205.111
	9.6348	210.333
	9.6866	203.778
	9.7384	228.444
	9.7902	213
	9.842	210.889
	9.8938	205
	9.9456	200.333
	9.9974	213
	10.0492	203.111
	10.101	209.333
	10.1528	201.222
	10.2046	205.111
	10.2564	210.111
	10.3082	201.333
	10.36	206.889

## Sheet: Fig. 2F
	Density (molecules/mm2)	Bait bound ratio of prey, r	r/(1-r)	Bound/Unbound ratio of bait	KD (molecules/mm2)
Cell-1	922.237	0.5278	1.11775	0.000572304	825.086
Cell-2	1359.52	0.61	1.5641	0.000448689	869.199
Cell-3	1056.2	0.5793	1.37699	0.000548474	767.038
Cell-4	1443.63	0.6211	1.63922	0.000430234	880.683
Cell-5	600.083	0.4047	0.679825	0.000674407	882.702
Cell-6	267.931	0.2029	0.254548	0.000757284	1052.58
Cell-7	167.529	0.1338	0.154468	0.000798668	1084.56
Cell-8	557.778	0.3436	0.523461	0.000616016	1065.56
Cell-9	426.418	0.2533	0.339226	0.000594018	1257.03
Cell-10	476.118	0.3836	0.622323	0.000805682	765.066
Cell-11	367.397	0.2387	0.313543	0.000649706	1171.76
Cell-12	409.23	0.2485	0.330672	0.000607238	1237.57
Cell-13	351.572	0.2914	0.411233	0.000828848	854.921
Cell-14	385.935	0.2991	0.426737	0.000775001	904.386

## Sheet: Fig. 2G
COS7			Hela			HEK293			CHO-K1
	Cell-1	825.086		Cell-01	1082.31		Cell-01	534.349		Cell-01	755.259
	Cell-2	869.199		Cell-02	895.199		Cell-02	1195.66		Cell-02	892.331
	Cell-3	767.038		Cell-03	526.425		Cell-03	1255.69		Cell-03	667.41
	Cell-4	880.683		Cell-04	806.156		Cell-04	1243.51		Cell-04	979.796
	Cell-5	882.702					Cell-05	1078.7
	Cell-6	1052.58					Cell-06	604.229
	Cell-7	1084.56					Cell-07	805.755
	Cell-8	1065.56					Cell-08	952.645
	Cell-9	1257.03
	Cell-10	765.066
	Cell-11	1171.76
	Cell-12	1237.57
	Cell-13	854.921
	Cell-14	904.386

## Sheet: Fig. 2H
	log10(KD)	Probability density
	2.23	0.0118
	2.3068	0.0047091
	2.3836	0.0141
	2.4604	0.04
	2.5373	0.1177
	2.6141	0.2449
	2.6909	0.5109
	2.7678	0.81
	2.8446	1.2691
	2.9214	1.7212
	2.9982	2.072
	3.0751	1.8059
	3.1519	1.5846
	3.2287	1.1443
	3.3056	0.744
	3.3824	0.4591
	3.4592	0.2143
	3.536	0.1201
	3.6129	0.0565
	3.6897	0.0259
	3.7665	0.0259
	3.8434	0.0094182
	3.9202	0
	3.997	0.0023545
	4.0739	0
	4.1507	0.0070636
	4.2275	0
	4.3043	0.0047091
	4.3812	0
	4.458	0.0023545

## Sheet: Fig. 2I
	Line #1	Line #2	Line #3
	0	0	0
	0	0	611.347
	0	422.736	1035.23
	0	591.951	1009.87
	433.041	578.721	1099.8
	926.168	611.866	1146.81
	643.188	1101.52	1122.68
	564.769	1547.72	1067.21
	922.295	1953.44	1137.42
	1084.17	1552.5	1248.98
	844.526	1212.81	1451.85
	936.305	1282.2	1623.89
	1460.81	1094.12	1738.91
	2061.49	1452.98	2354.03
	1914.62	1035.32	2035.66
	1847.61	964.175	1351.27
	1823.34	942.813	1873.87
	1598.37	1531.68	2082.63
	2096.61	1291.51	1981.8
	1960.39	1566.08	2014.15
	2109.49	1812.09	1809.06
	2508.75	2070.58	1721.49
	2572.8	1339.85	2380.65
	1483.31	2683.15	2105.15
	1356.61	1978.92	2082.11
	1146.95	1640.93	2049.64
	1008.25	1738.2	1331.11
	1449.38	1728.05	1530.54
	2172.41	1379.72	1877.8
	2108.1	1270.29	1244.54
	1367.56	972.576	633.746
	1168.05	1098.9	851.552
	1411.68	1226	1149.87
	2102.03	931.226	886.647
	1937.22	1141.66	730.881
	1798.26	1216.4	728.934
	1073.59	1447.95	576.698
	249.096	1343.38	764.908
	0	543.639	706.803
	0	0	0

## Sheet: Fig. 2J
		Edge	Center
	Pixel-1	1262.8	1291.3
	Pixel-2	815.429	1394.9
	Pixel-3	1080.2	1522.1
	Pixel-4	1187.5	1650
	Pixel-5	599.297	1028.3
	Pixel-6	653.599	797.956
	Pixel-7	1093.4	1343.1
	Pixel-8	1119.2	1158.1
	Pixel-9	1198.9	1514.2
	Pixel-10	1075	1180.9
	Average KD	1008.53	1288.09

## Sheet: Fig. 3A
EGFR WT
	NT			EGF
			KD (molecules/mm2)			KD (molecules/mm2)
		Cell-01	1478.75		Cell-01	67.4301
		Cell-02	1087.39		Cell-02	109.319
		Cell-03	2255.79		Cell-03	90.8016
		Cell-04	1829.34		Cell-04	118.591
		Cell-05	1383.47		Cell-05	171.23
		Cell-06	1598.4		Cell-06	174.018

[truncated: 8 more sheets: Fig. 3B, Fig. 3C, S1 Fig., S2 Fig., S3 Fig., S7 Fig., S9 Fig., S10 Fig.]
